# Supplementary material for: Solution processed high performance perovskite solar cells based on a silver nanowire-titanium dioxide hybrid top electrode
Source: Royal Society of Chemistry journal article supplement (doi:10.1039/d2ra06778a), 2022-01-01
Supplement: d2ra06778a1.pdf [file d2ra06778a1.pdf]

# Supporting Information

**For**

**Solution processed high performance perovskite solar cells based on silver  
nanowires-titanium dioxide hybrid top electrode**

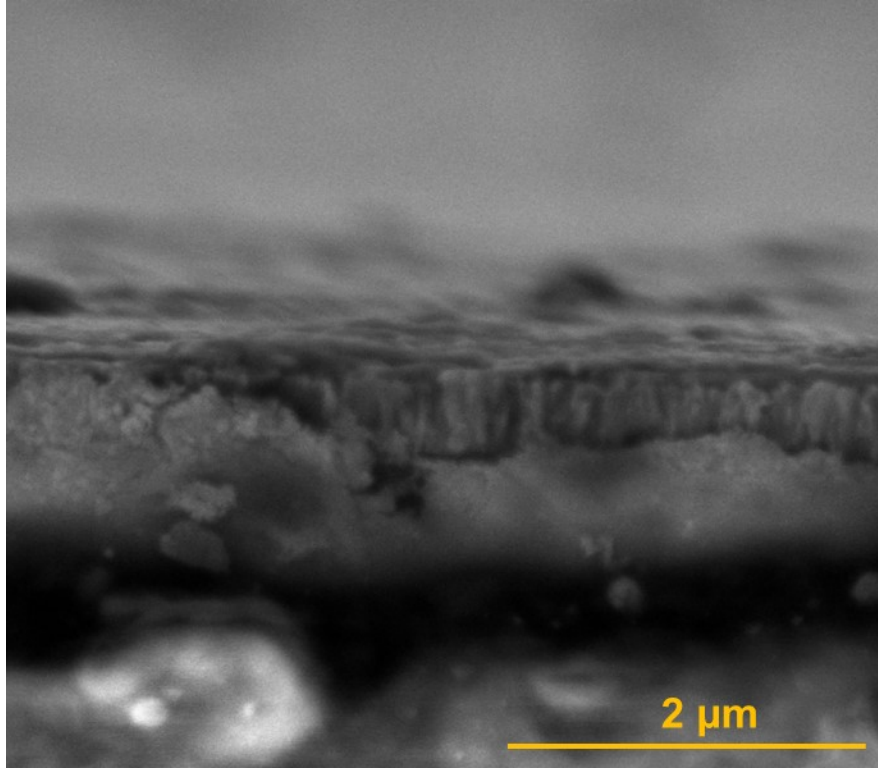

**Fig. S1** Side-view SEM image of complete device.

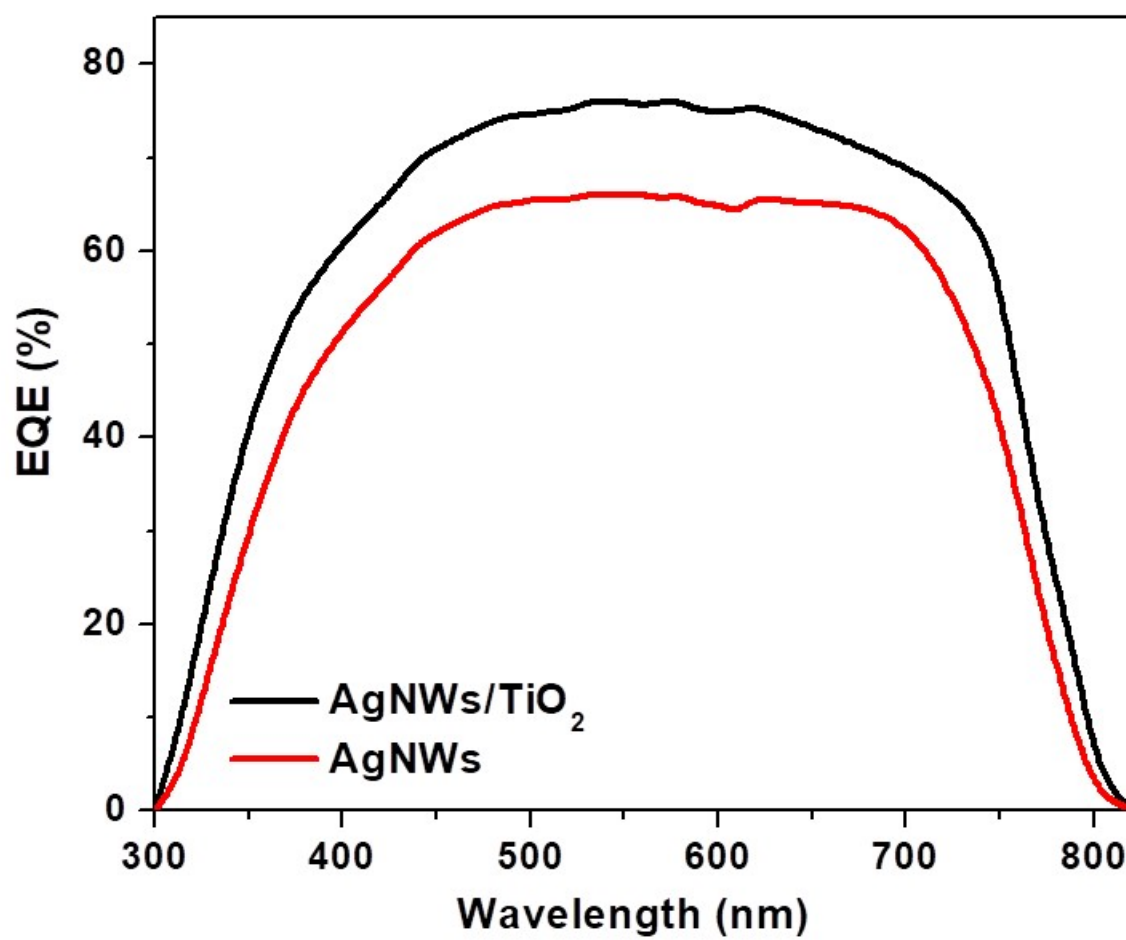

**Fig. S2** EQE characteristics of the devices based on AgNWs and AgNWs/TiO<sub>2</sub> hybrid electrode.

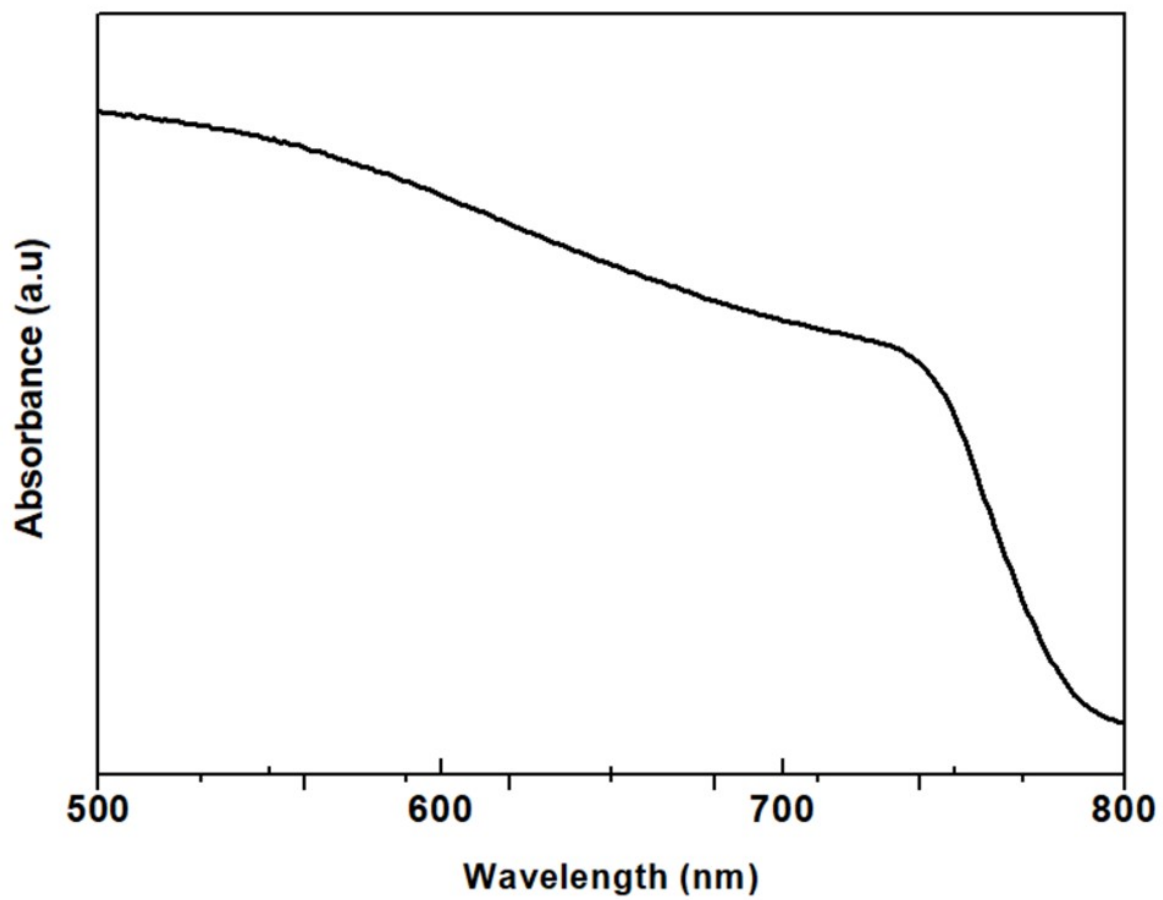

**Fig. S3** Absorption spectra of the cell with the structure of ITO/ETL/Perovskite.
